# Supplementary material for: Rational Design for Enhanced Acyltransferase Activity in Water Catalyzed by the Pyrobaculum calidifontis VA1 Esterase
Source: MDPI journal article supplement (doi:10.3390/microorganisms9081790), 2021-08-23
Supplement: s1 [file s1]

## Supplementary Material

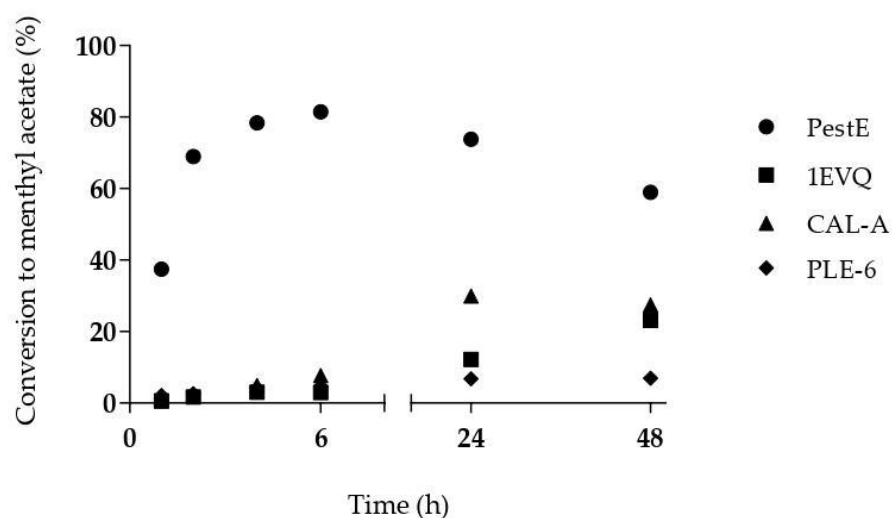

**Figure S1.** Enzymatic acylation of ( $\pm$ )-menthol over time with vinyl acetate as acyl donor. Reaction conditions: molar ratio 1:100 (alcohol:acyl donor), concentration of 20 mM ( $\pm$ )-menthol in 1 mg lyophilized enzyme lysate per mL aqueous buffer (200 mM potassium phosphate, pH 8.0), 1000 rpm and 40°C, for reactions conducted with PestE, 1EVQ or CAL-A. For reactions conducted with PLE-6 the molar ratio was reduced to 1:10 (alcohol:acyl donor). In control reactions without enzymes no ester product formation was observed.

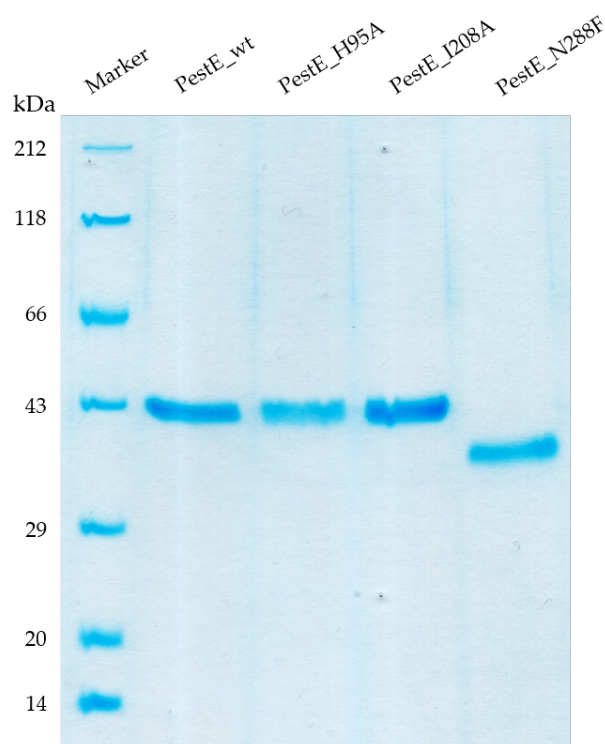

**Figure S2.** SDS-PAGE analysis of samples of the purified PestE (wt and variants) used in this study. Pierce™ Unstained Protein MW Marker (ThermoFisher, Germany) was used as a reference.

**Table S1.** Conversion (%) of (±)-citronellol and vinyl acetate to citronellyl acetate over time using PestE wild type and mutants as biocatalysts

| Time (min) | PestE_wt | PestE_H95A | PestE_I208A | PestE_N288F |
|------------|----------|------------|-------------|-------------|
| 5          | 40       | 21         | 55          | 5           |
| 30         | 83       | 55         | 82          | 22          |
| 60         | 99       | 85         | 99          | 48          |
| 120        | 100      | 99         | 100         | 81          |
| 180        | 100      | 100        | 100         | 96          |
| 240        | 100      | 97         | 100         | 100         |
| 480        | 100      | 99         | 100         | 100         |
| 1440       | 100      | 96         | 100         | 100         |

Conversion (%) was determined by GC-MS. Reaction conditions: molar ratio 1:10 ((±)-citronellol:vinyl acetate), using 20 mM (±)-citronellol, 0.1 % (v/v) Triton-X-100, 0.2 µg.mL<sup>-1</sup> of the purified enzymes in 1 mL aqueous buffer (50 mM potassium phosphate, 300 mM sodium chloride, pH 8.0) at 1000 rpm and 40°C. Reactions without enzymes did not show the formation of ester product.

**Table S2.** Conversion (%) of citronellol and ethyl acetate to citronellyl acetate over time using PestE wild type and mutants as biocatalysts

| Time (min) | PestE_wt | PestE_H95A | PestE_I208A | PestE_N288F |
|------------|----------|------------|-------------|-------------|
| 5          | 19       | 11         | 21          | 11          |
| 30         | 63       | 42         | 64          | 40          |
| 60         | 79       | 65         | 81          | 67          |
| 120        | 83       | 78         | 83          | 85          |
| 180        | 80       | 82         | 79          | 90          |
| 240        | 76       | 82         | 76          | 92          |
| 480        | 66       | 71         | 64          | 88          |
| 1440       | 53       | 53         | 55          | 80          |

Conversion (%) was determined by GC-MS. Reaction conditions: molar ratio 1:10 ((±)-citronellol:ethyl acetate), using 20 mM (±)-citronellol, 0.1 % (v/v) Triton-X-100, 0.2 µg.mL<sup>-1</sup> of the purified enzymes in 1 mL aqueous buffer (50 mM potassium phosphate, 300 mM sodium chloride, pH 8.0) at 1000 rpm and 40°C. Reactions without enzymes did not show the formation of ester product.

**Table S3.** Conversion (%) of carvacrol to carvacryl acetate over time using PestE wild type and mutants as biocatalysts

| Time (min) | Without enz | PestE_wt | PestE_H95A | PestE_I208A | PestE_N288F |
|------------|-------------|----------|------------|-------------|-------------|
| 5          | 0           | 1        | <1         | 1           | 1           |
| 20         | 0           | 2        | 2          | 2           | 2           |
| 30         | 0           | 4        | 2          | 5           | 1           |
| 45         | < 1         | 7        | 6          | 11          | 5           |
| 60         | 1           | 4        | 4          | 5           | 4           |
| 120        | 2           | 4        | 3          | 3           | 2           |
| 240        | 3           | 2        | 2          | 3           | 1           |
| 1440       | 2           | 2        | 1          | 1           | 1           |

Conversion (%) was determined by GC-MS. Reaction conditions: molar ratio 1:10 (carvacrol:vinyl acetate), using 20 mM carvacrol, 0.1 % (v/v) Triton-X-100, 0.2 µg.mL<sup>-1</sup> of the purified enzymes in 1 mL aqueous buffer (50 mM potassium phosphate, 300 mM sodium chloride, pH 8.0) at 1000 rpm and 40°C.

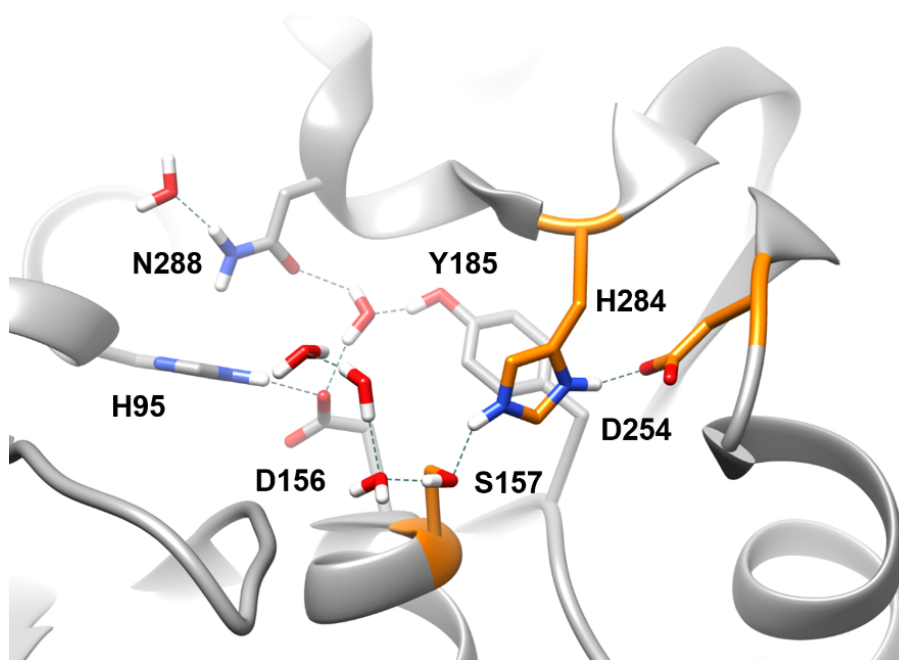

**Figure S3.** Water network within the PestE wild type active site.

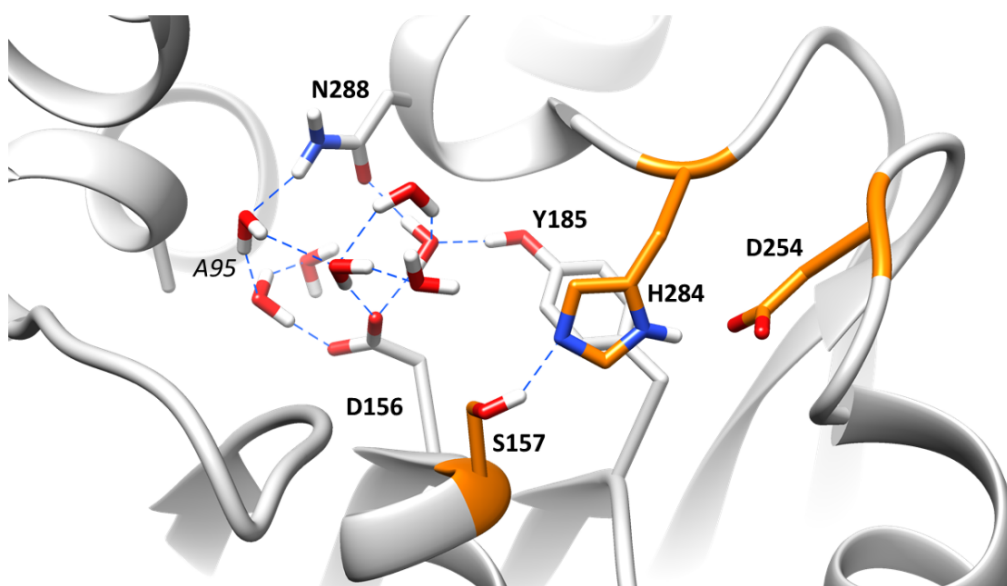

**Figure S4.** Water network within the PestE\_H95A active site. Simulated by Molecular Dynamics with YASARA Software.

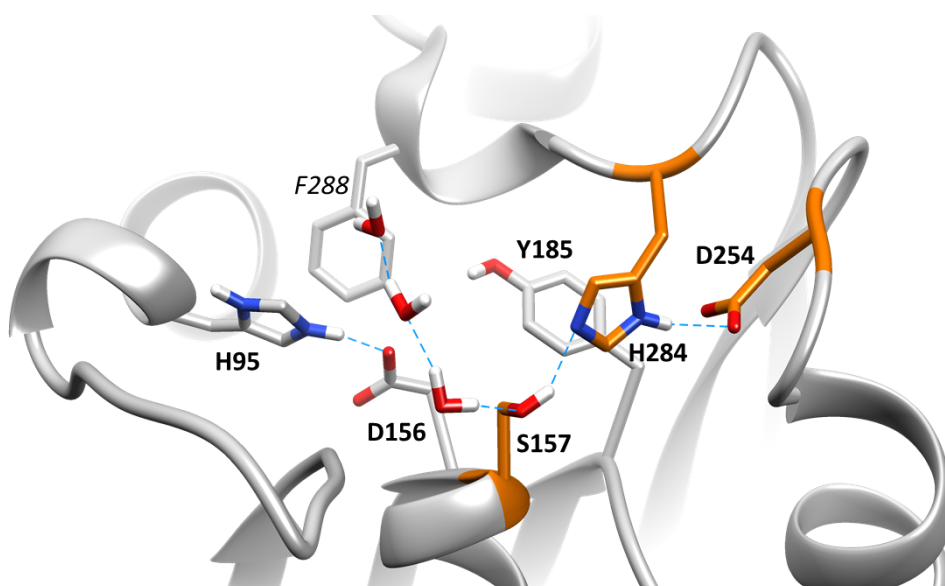

**Figure S5.** Water network within the PestE\_N288F active site. Simulated by Molecular Dynamics with YASARA Software.
